# Supplementary material
Source: PubMed Central journal article supplement (PMC5533277)
Supplement: NIHMS882927-supplement-s1.pdf [file NIHMS882927-supplement-s1.pdf]

## SUPPLEMENTARY FIGURES

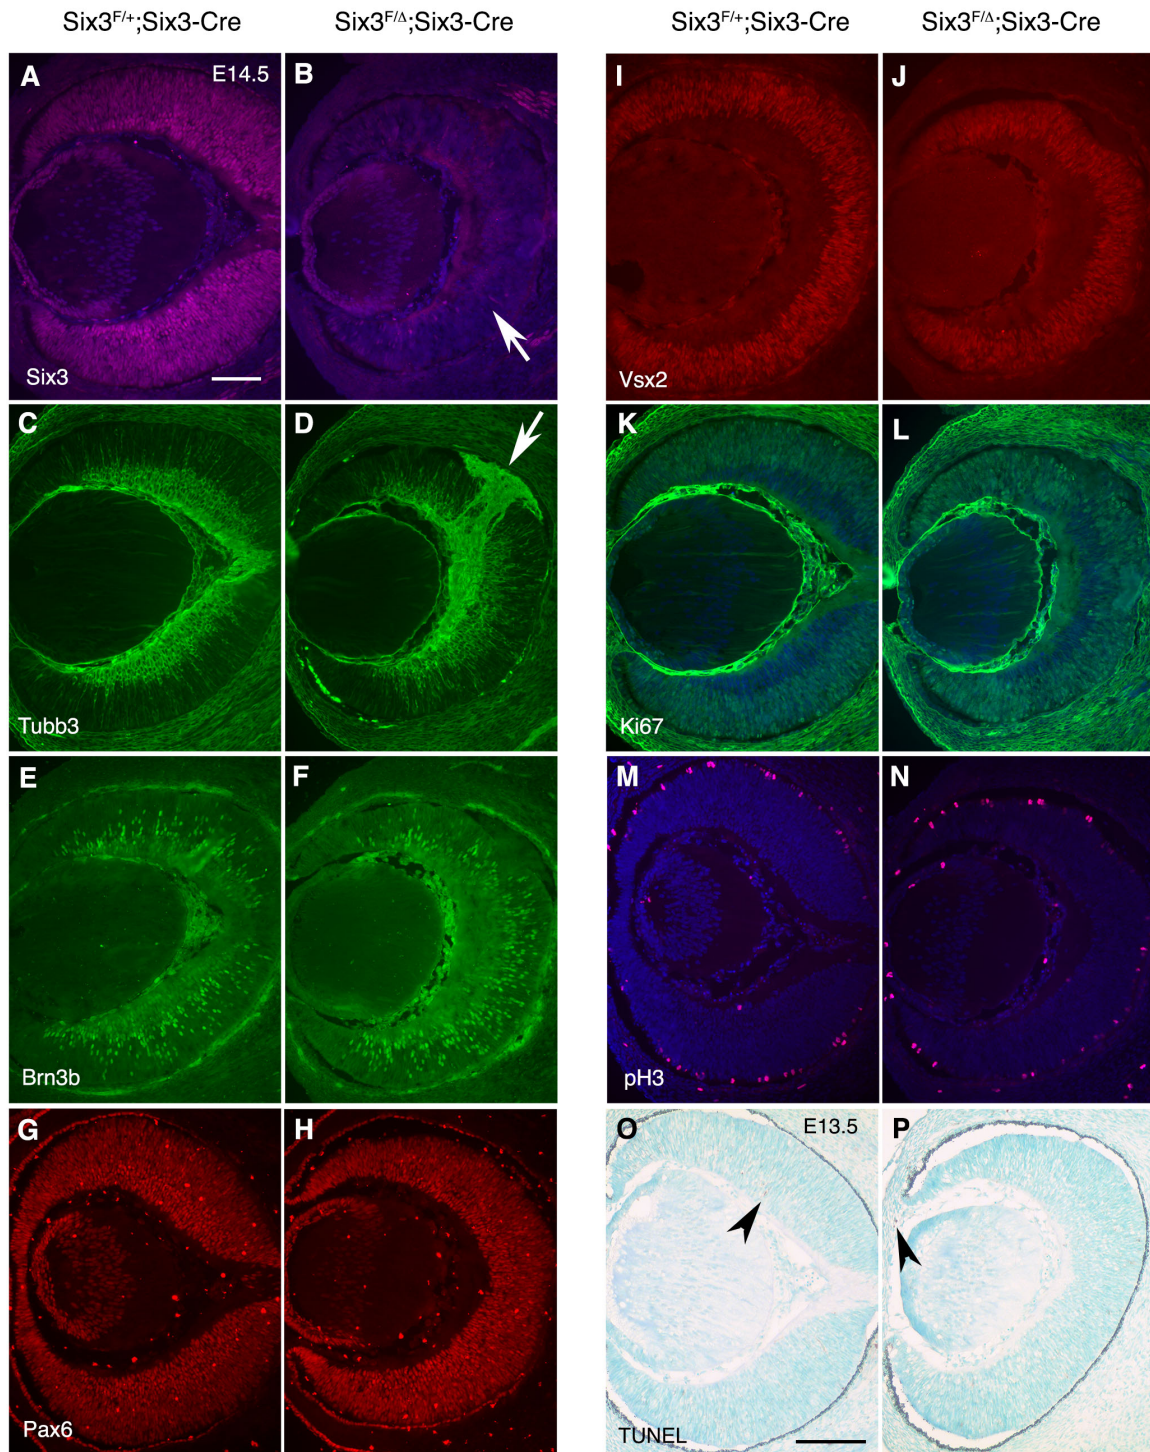

**Fig. S1. Characterization of type I (morphological normal) *Six3<sup>Six3-Cre KO</sup>* retinæ at E13.5-14.5. Related to Figs 2, 3.** Panels A-N were at E14.5 and panels O-P were at E13.5. The results represent three morphologically normal mutant embryos. (A, B) *Six3* was efficiently deleted in the NR (arrow in B). Mutant NR was slightly smaller. (C, F) Retinal ganglion cell differentiation was grossly unaffected, as indicated by normal

Tubb3 and Pou4f2 expression. Occasionally, axon pathfinding errors were found (arrow in D, n=1/3). **(G-J)** Retinal progenitors were grossly unaffected, as indicated by normal Pax6 and Vsx2 expression. **(K-N)** Ki67 and pH3 expression in the control and *Six3*<sup>Six3-Cre KO</sup> retinae at E14.5. pH3 index in type I *Six3*<sup>Six3-Cre KO</sup> mutant retinae at E14.5 was slightly reduced without statistical significance ( $6.77\text{E-}05 \pm 6.45\text{E-}06$  vs.  $7.53\text{E-}05 \pm 4.99\text{E-}06$ ,  $p=0.259$ , *t*-test). The pH3 index was calculated as the ratio of the number of pH3-positive cells over the areas of retinal epithelium, assuming that the total number of retinal cells is proportional to the size of retinal epithelium in the control and type I *Six3*<sup>Six3-Cre KO</sup> mutant retinae. Two wild type and three *Six3*<sup>Six3-Cre KO</sup> mutant retinae at E14.5 were quantified using ImageJ. **(O-P)** TUNEL assay. Apoptosis was rarely found in both the control and type I *Six3*<sup>Six3-Cre KO</sup> retinae at E13.5. A few apoptotic cells indicated that TUNEL assay worked (arrowheads in O, P). Scale bars = 100  $\mu\text{m}$ .

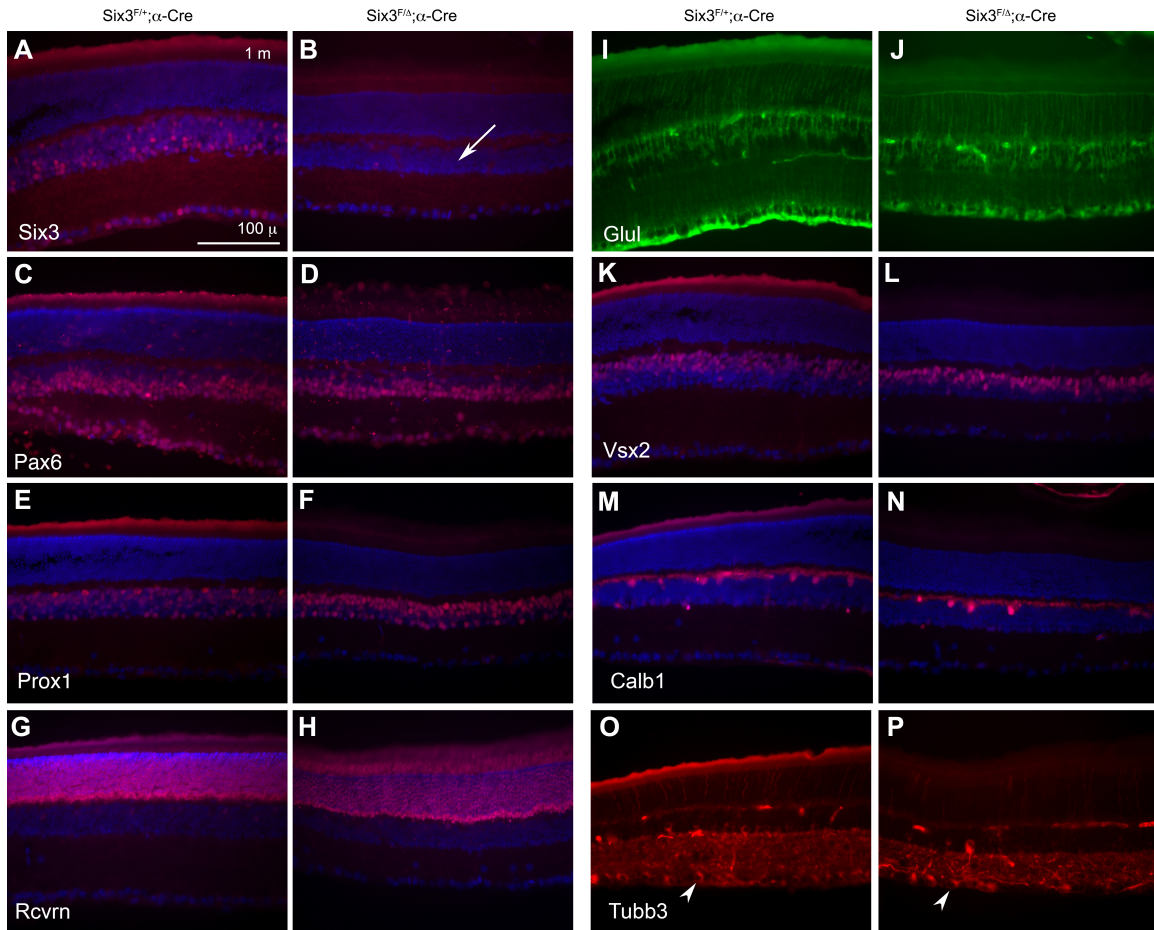

**Fig. S2. Retinal cell fate determination is normal in Pax6  $\alpha$ -Cre mediated Six3-deficient retinae. Related to Figure 3.** Represent three retinae. Six3 was conditionally deleted in distal retinae using Pax6  $\alpha$ -Cre. Distal regions of the control and Six3-deficient retinae at 1-month stage were used for immunostaining. (A, B) Six3 was efficiently deleted in distal regions. (C-P) Major retinal cell types were present in Six3 mutant retinae, as indicated by a panel of markers. Scale bars, 100  $\mu$ m.

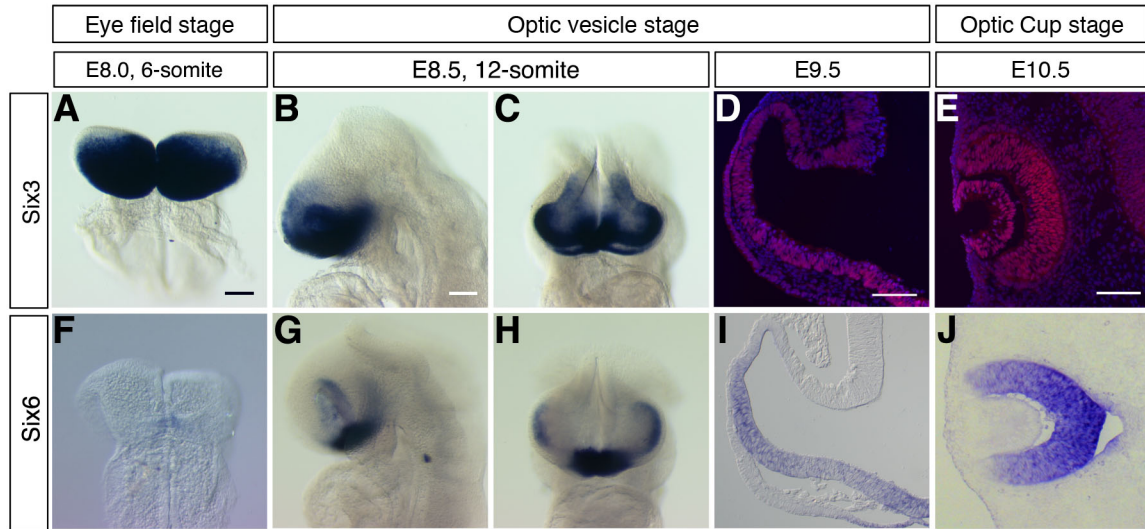

**Fig. S3. Comparison of *Six3* and *Six6* expression during retinal development. Related to Figs 2, 4.** The results represent three embryos at each stage. **(A-J)** In mouse retinal development, *Six3* expression (A) preceded *Six6* expression (F), and was localized in the anterior neural plate, including the eye field. At E8.5, *Six3* expression was strong in the evaginating optic vesicles (B, C), but *Six6* expression was still weak in optic vesicles (G, H). At E9.5 and E10.5, the expression of *Six3* and that of *Six6* overlapped in the ventral optic vesicles (D, I) and the inner layer of optic cups (E, J). Scale bars, 100  $\mu$ m.

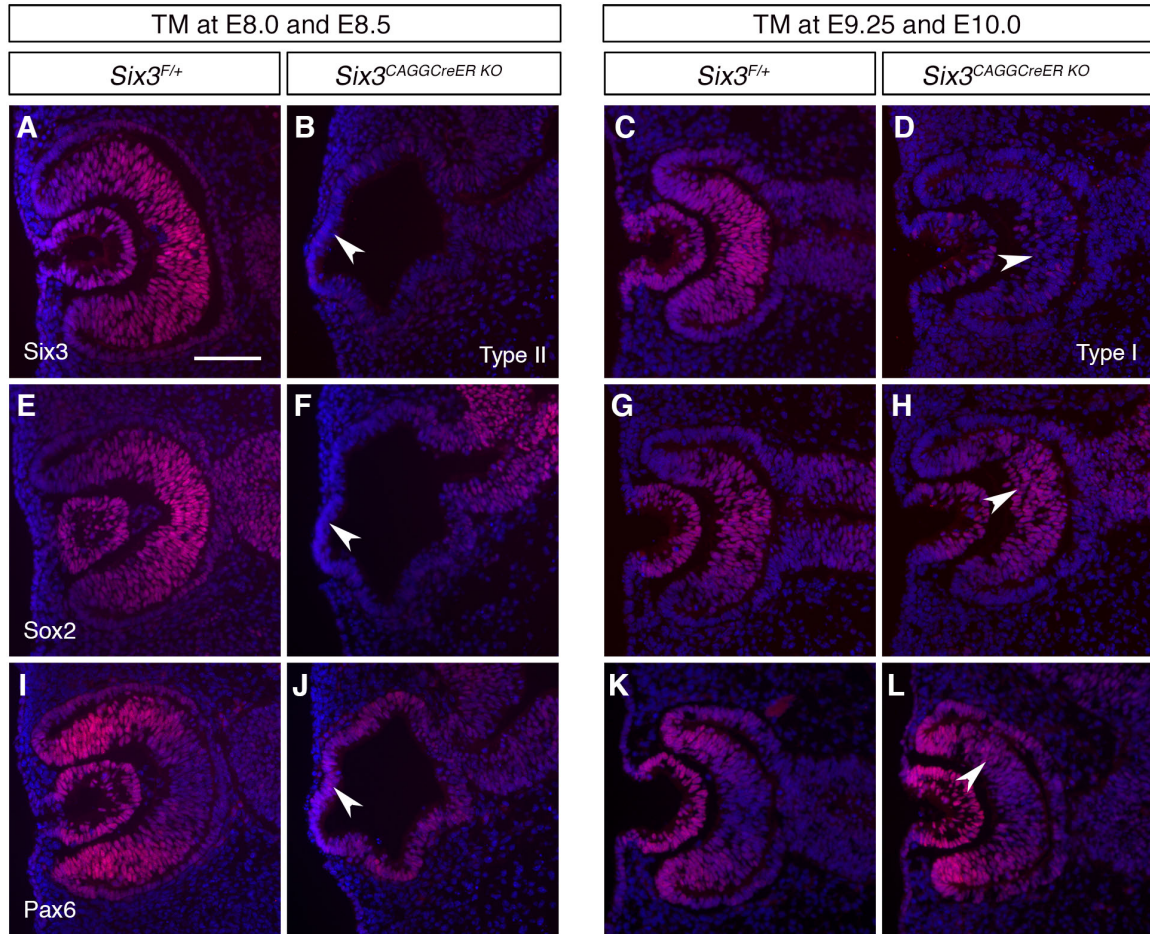

**Fig. S4. Early (E8.0-8.5) and late (E9.25-10.0) *Six3*-deficiency causes type II and type I phenotypes, respectively. Related to Fig. 2.** The results represent three out of three mutant embryos. *Six3* was temporally deleted using CAGG-CreER at early and late phases by administration of Tamoxifen (TM): two doses at E8.0 and E8.5 for early phase deletion, and two doses at E9.25 and E10.0 for late phase deletion. Embryos were harvested at E10.5 for molecular characterization. **(A-D)** *Six3* was efficiently deleted at both phases (arrowheads in B, D). **(E-L)** Upon early deletion, *Six3*-deficient embryos displayed type II phenotypes: optic cups did not form, NR marker Sox2 was absent, and NR and RPE marker Pax6 was expressed in the whole defective vesicles (arrowheads in F, J). Upon late deletion, *Six3*-deficient embryos exhibited type I phenotypes: optic cups formed normally, and Sox2 and Pax6 were expressed normally compared with those in the controls (arrowheads in H, L). Scale bar = 100  $\mu$ m.

Six3<sup>F/+</sup>;Rx-Cre;R26R

Six3<sup>F/Δ</sup>;Rx-Cre;R26R

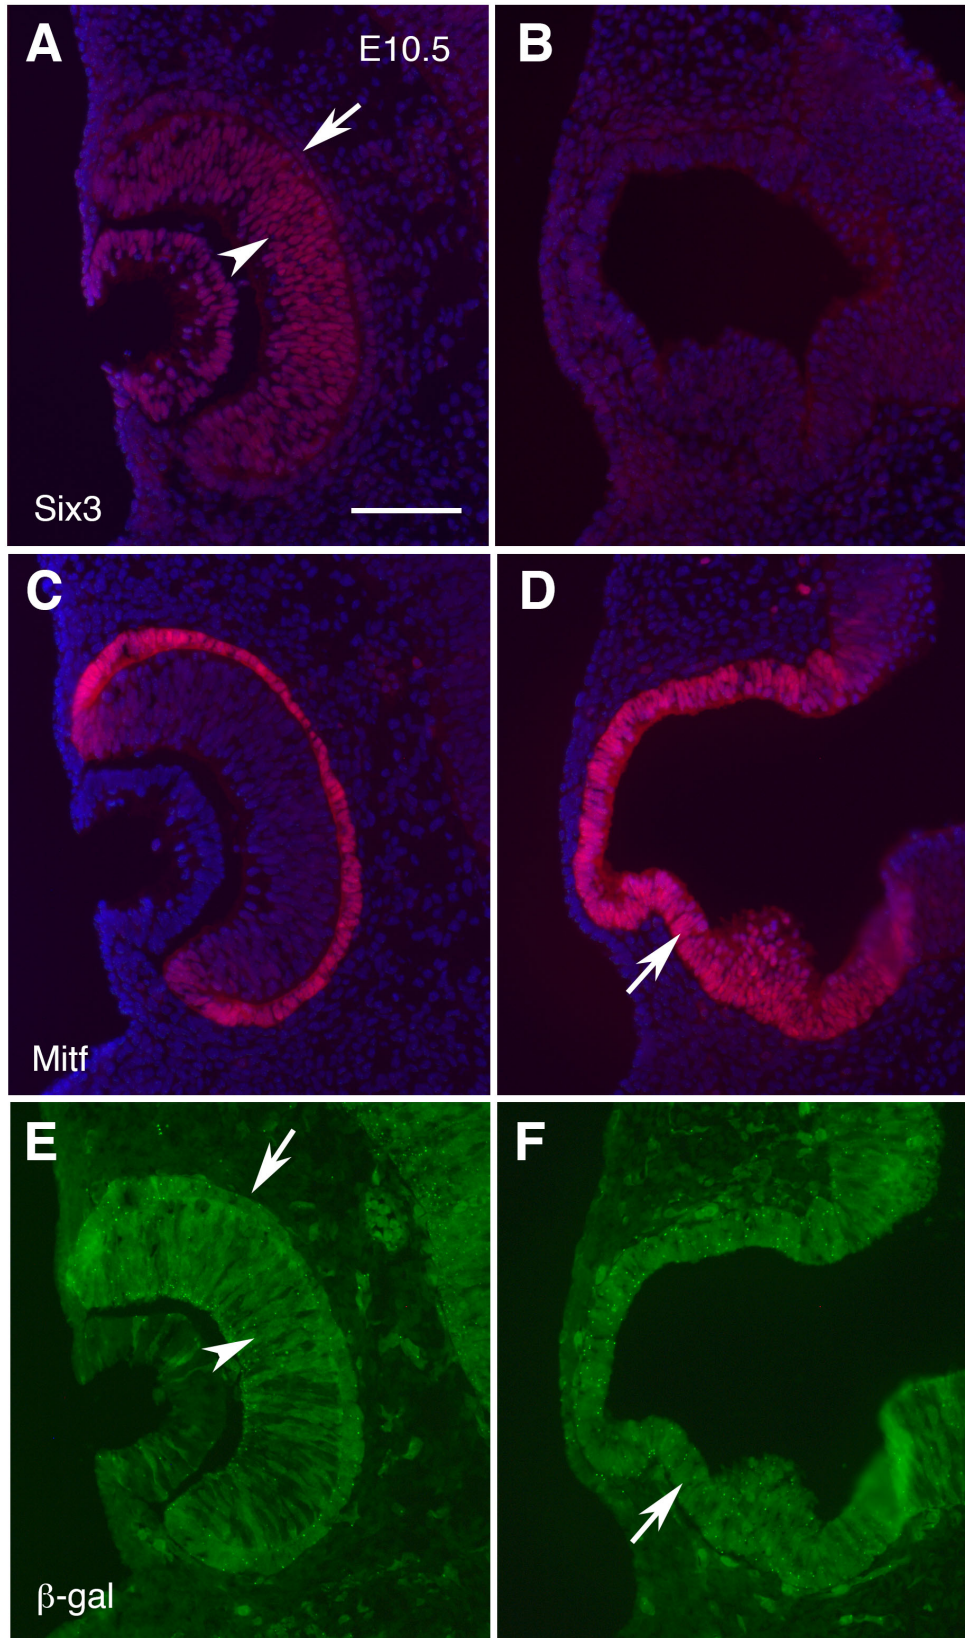

**Fig. S5. Gene expression in R26R locus is active in RPE cells and does not require Six3 functions. Related to Fig. 5. (A-D)** At E10.5, Six3 was highly expressed in the NR but was significantly downregulated in the RPE (arrowhead and arrow in A). When Rx-Cre was used as a deleter, Six3-deficiency disrupted NR specification but did not affect RPE formation (A-D). **(E, F)** Rx-Cre positive progenies were found in both NR and RPE in E10.5 control embryos (arrowhead and arrow in E). Importantly, the remnant RPE in the *Six3<sup>Rx-Cre KO</sup>* mutant embryos expressed R26R reporter for Rx-Cre, indicating that gene expression in R26R locus is active in RPE and does not require Six3 functions (arrow in F). Scale bar, 100  $\mu$ m.

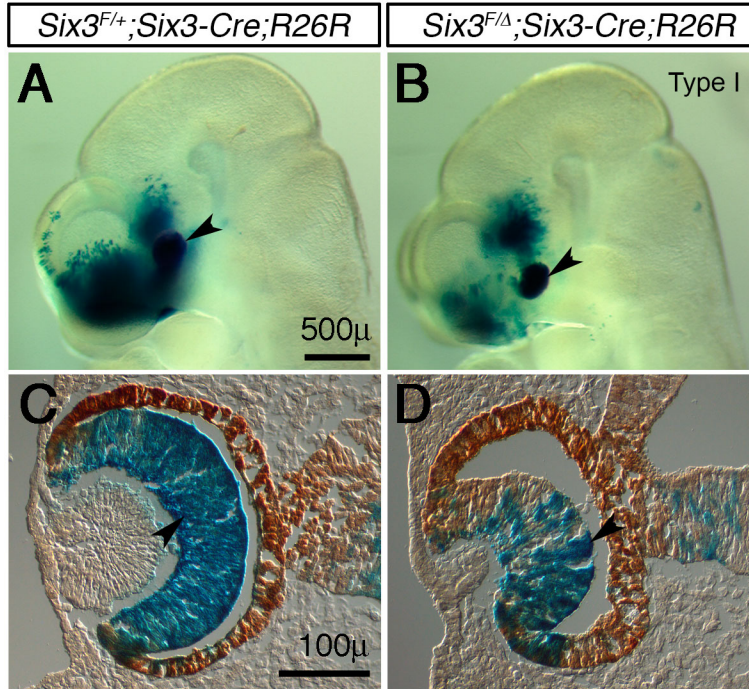

**Fig. S6. *Six3*-Cre positive progenies remain in type I *Six3<sup>Six3-Cre KO</sup>* retinæ. Related to Fig. 5.** The results represent three mutant embryos. **(A-D)** Embryos from the breeding between female *Six3<sup>F/F</sup>;R26R/R26R* mice and male *Six3<sup>+/Δ</sup>;Six3-Cre* mice were harvested at E10.5 for X-gal staining. Control and type I mutant embryos (defined by normal morphology in the eyes, n = 3) were sectioned and immunostained with a Mitf antibody. In type I *Six3<sup>Six3-Cre KO</sup>* embryos, optic cups formed, Mitf expression was grossly normal, and β-gal positive cells remained in NR (arrowheads in A-D). Occasionally, type I optic cups were smaller than control optic cups (n=2/26). Scale bars, 500 μm (A) and 100 μm (C).



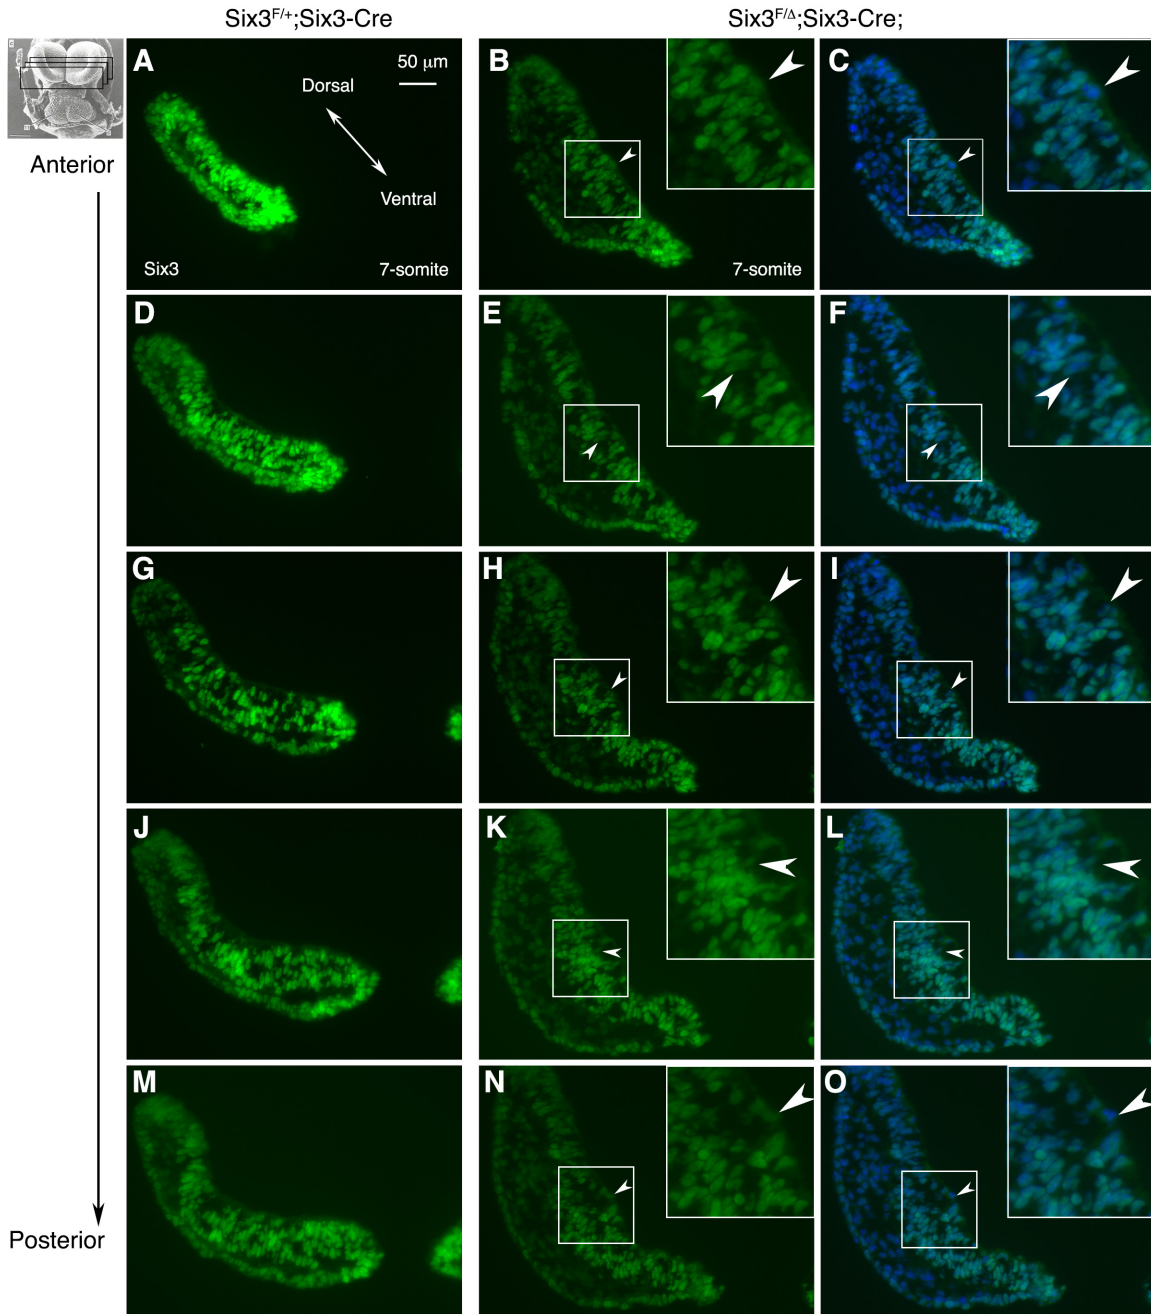

**Fig. S7. Six3-deletion in 7-somite *Six3*<sup>Six3-Cre KO</sup> embryos. Related to Fig. 6.** Serial coronal sections of 7-somite embryos were used for immunostaining. The images were processed the same way and thus the intensity of fluorescence reflects Six3 expression. (A-O) In the control embryos, Six3 expression displayed a gradient along anteroposterior axis and ventrodorsal axis, with high levels at the anteroventral eye field / optic pit (A,D,G,J,M). In *Six3*<sup>Six3-Cre KO</sup> embryos, Six3-deletion was found in a small population of progenitors (arrowheads in B,C,E,F,H,I,K,L,N,O), and the gross reduction of Six3 expression was striking at the anteroventral eye field / optic pit, consistent with the pattern of R26R reporter expression for Six3-Cre at 8- to 11-somite stages. Interestingly,

Six3-deficient cells appeared to be disintegrated from retinal epithelium (arrowheads in B,C,H,I,K,L,N,O), indicating that Six3-deficient cells were dying. Scale bar, 50  $\mu$ m.

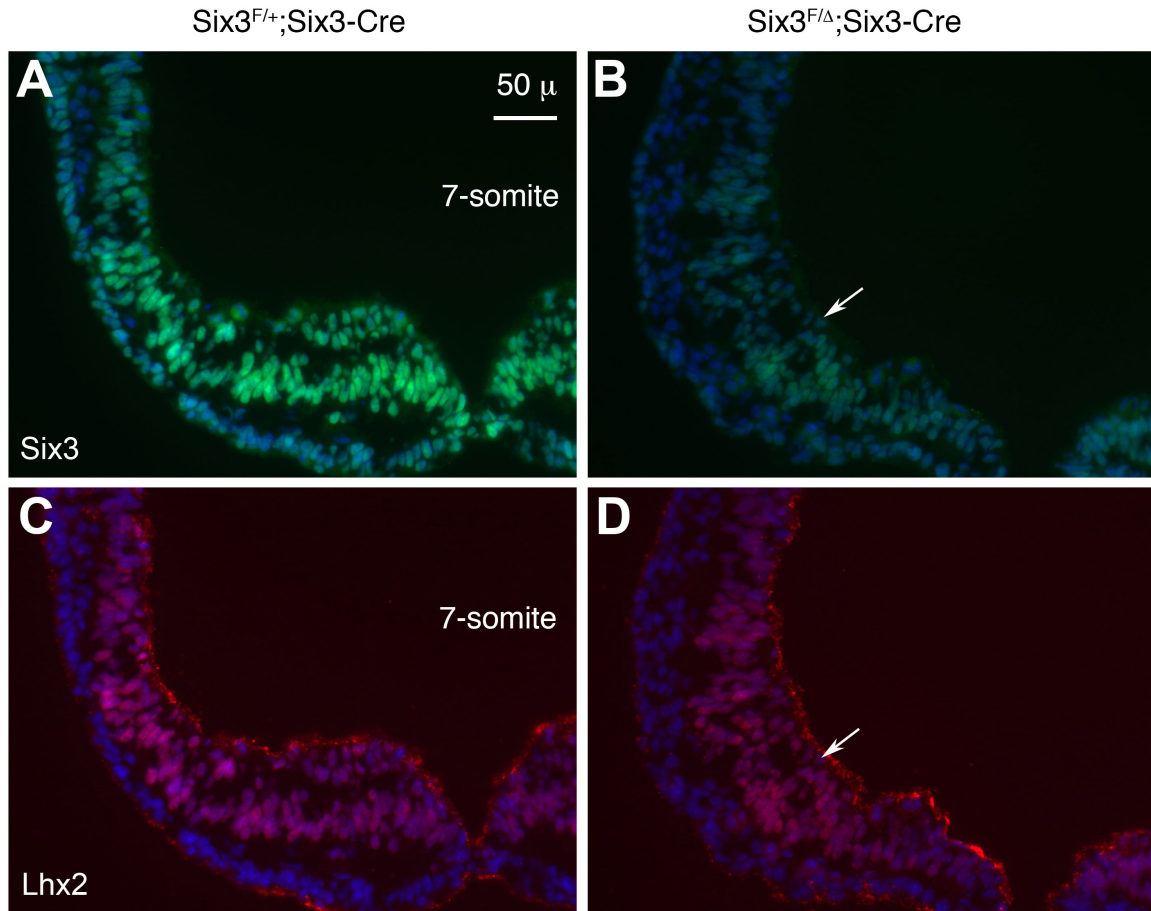

**Fig. S8. Lhx2 expression is slightly reduced in  $Six3^{Six3-Cre KO}$  mutant embryo at 7-somite stage. Related to Fig. 6.** Immunostaining of Six3 and Lhx2 was performed. (A, B) Six3 was absent in a small population of retinal progenitors (arrow in B). Overall reduction of Six3 expression in  $Six3^{Six3-Cre KO}$  mutant embryos was caused by germline Six3-deletion in one Six3 allele (A, B). (C, D) Lhx2 expression was slightly reduced in  $Six3^{Six3-Cre KO}$  mutant retinal progenitors (arrow in D). Scale bar, 50 μm.

*Six3*<sup>F/+</sup>; *Six3*-Cre; R26R

*Six3*<sup>F/Δ</sup>; *Six3*-Cre; R26R

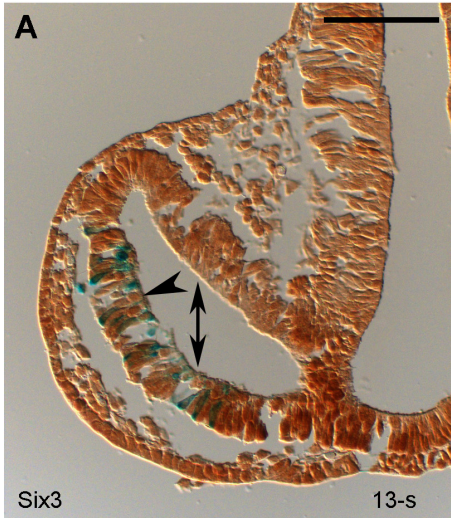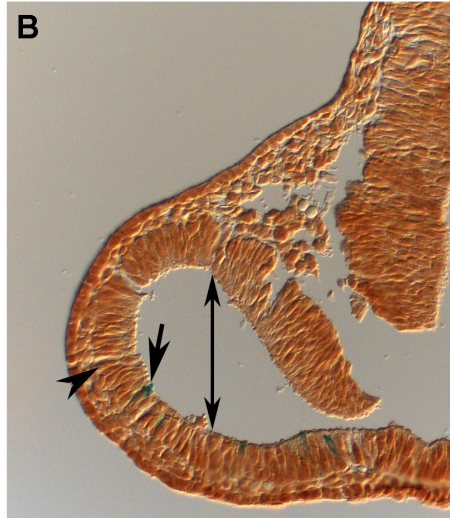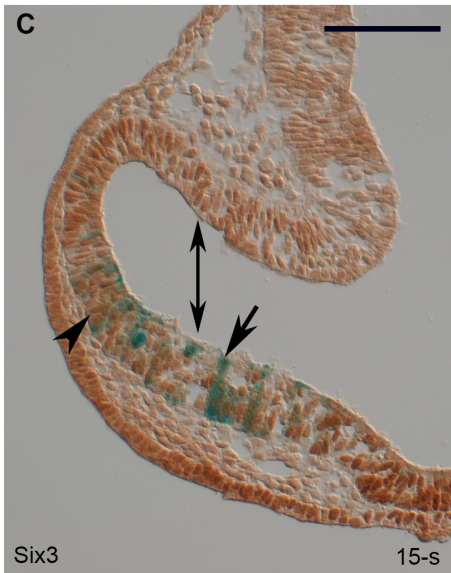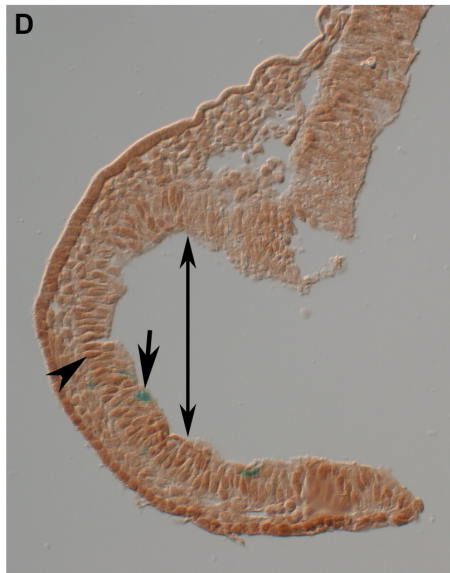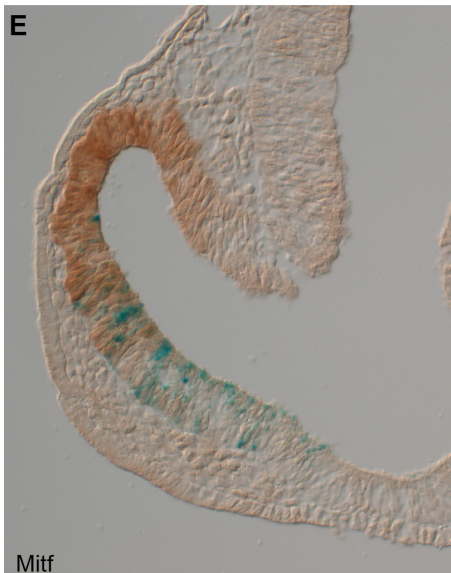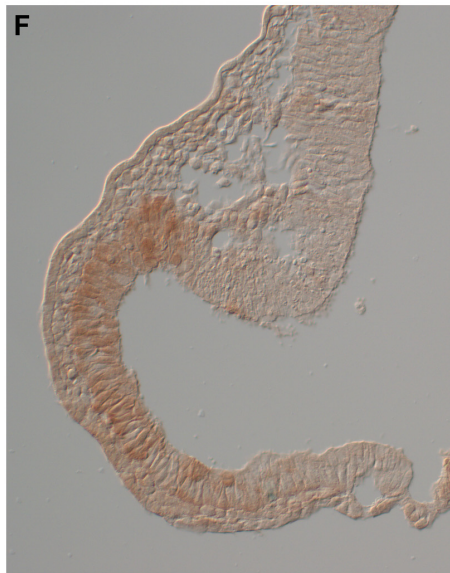

**Fig. S9. Six3-deletion and R26R reporter expression in Six3<sup>Six3-Cre KO</sup> mutant embryos. Related to Fig. 6. (A-F)** Morphological defects were obvious (double-headed arrows in A-D). At 13-somite stage, the number of  $\beta$ -gal positive cells was drastically reduced in the mutant embryos, and the remaining  $\beta$ -gal positive cells were clearly negative for Six3 and appeared to be disintegrated from retinal epithelium, indicating that the Six3-deficient cell was dying (arrow in B). In the  $\beta$ -gal negative cells, Six3 immunostaining remained (arrowheads in A, B). Similar results were found in mutant embryos at 15-somite stage (C, D). In addition, Mitf expression was expanded in 15-somite mutant embryo (E, F). Scale bars, 100  $\mu$ m.

Six3<sup>F/+</sup>;Rx-Cre;R26R

Six3<sup>F/Δ</sup>;Rx-Cre;R26R

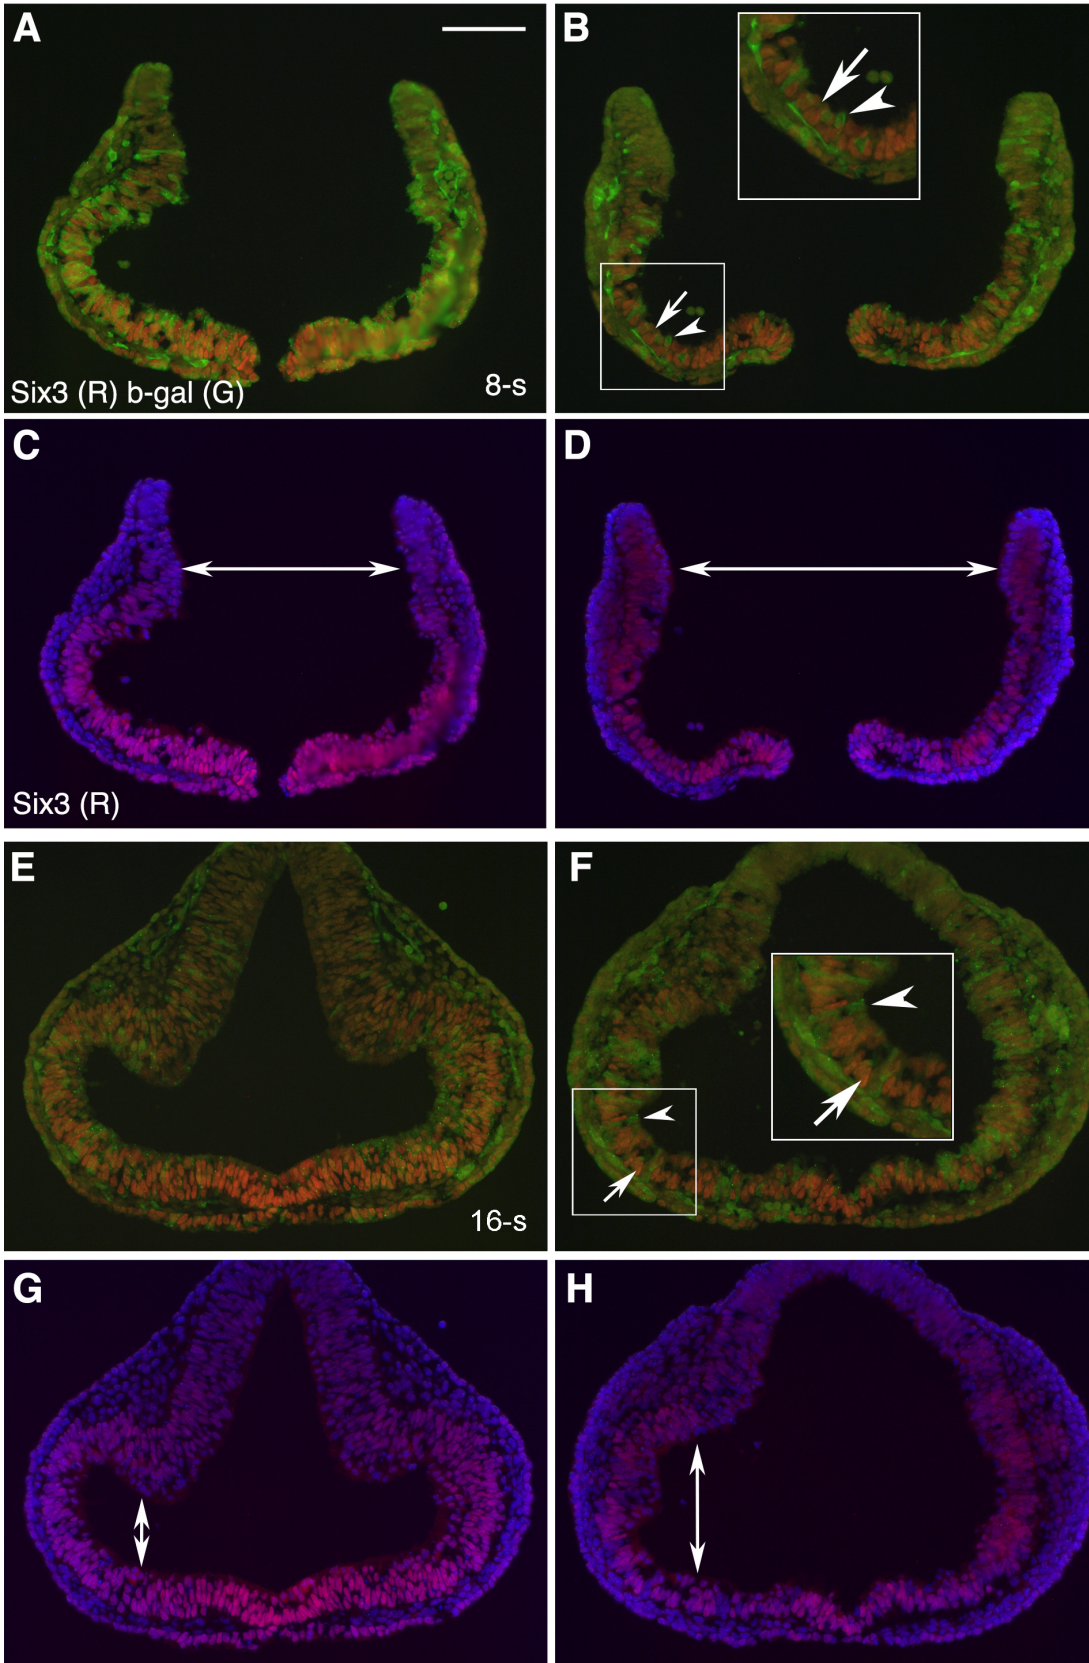

**Fig. S10. Six3-deletion and R26R reporter expression in Six3<sup>Rx-Cre KO</sup> mutant embryos driven by Rx-Cre. Related to Fig. 6. (A-H)** In the control embryos at 8-somite stage, R26R reporter for Rx-Cre was widely expressed (A). In Six3<sup>Rx-Cre KO</sup> mutant embryos driven by Rx-Cre, however, the number of R26R reporter positive cells was reduced (B). Accordingly, Six3 was only partially deleted (B, D), and Six3-positive cells and  $\beta$ -gal positive cells were mutually exclusive. Despite partial Six3-deletion, drastic morphological changes were observed (double-headed arrow in C, D). Similar results were found in 16-somite Six3<sup>Rx-Cre KO</sup> mutant embryos (E-H). Scale bar, 100  $\mu$ m.

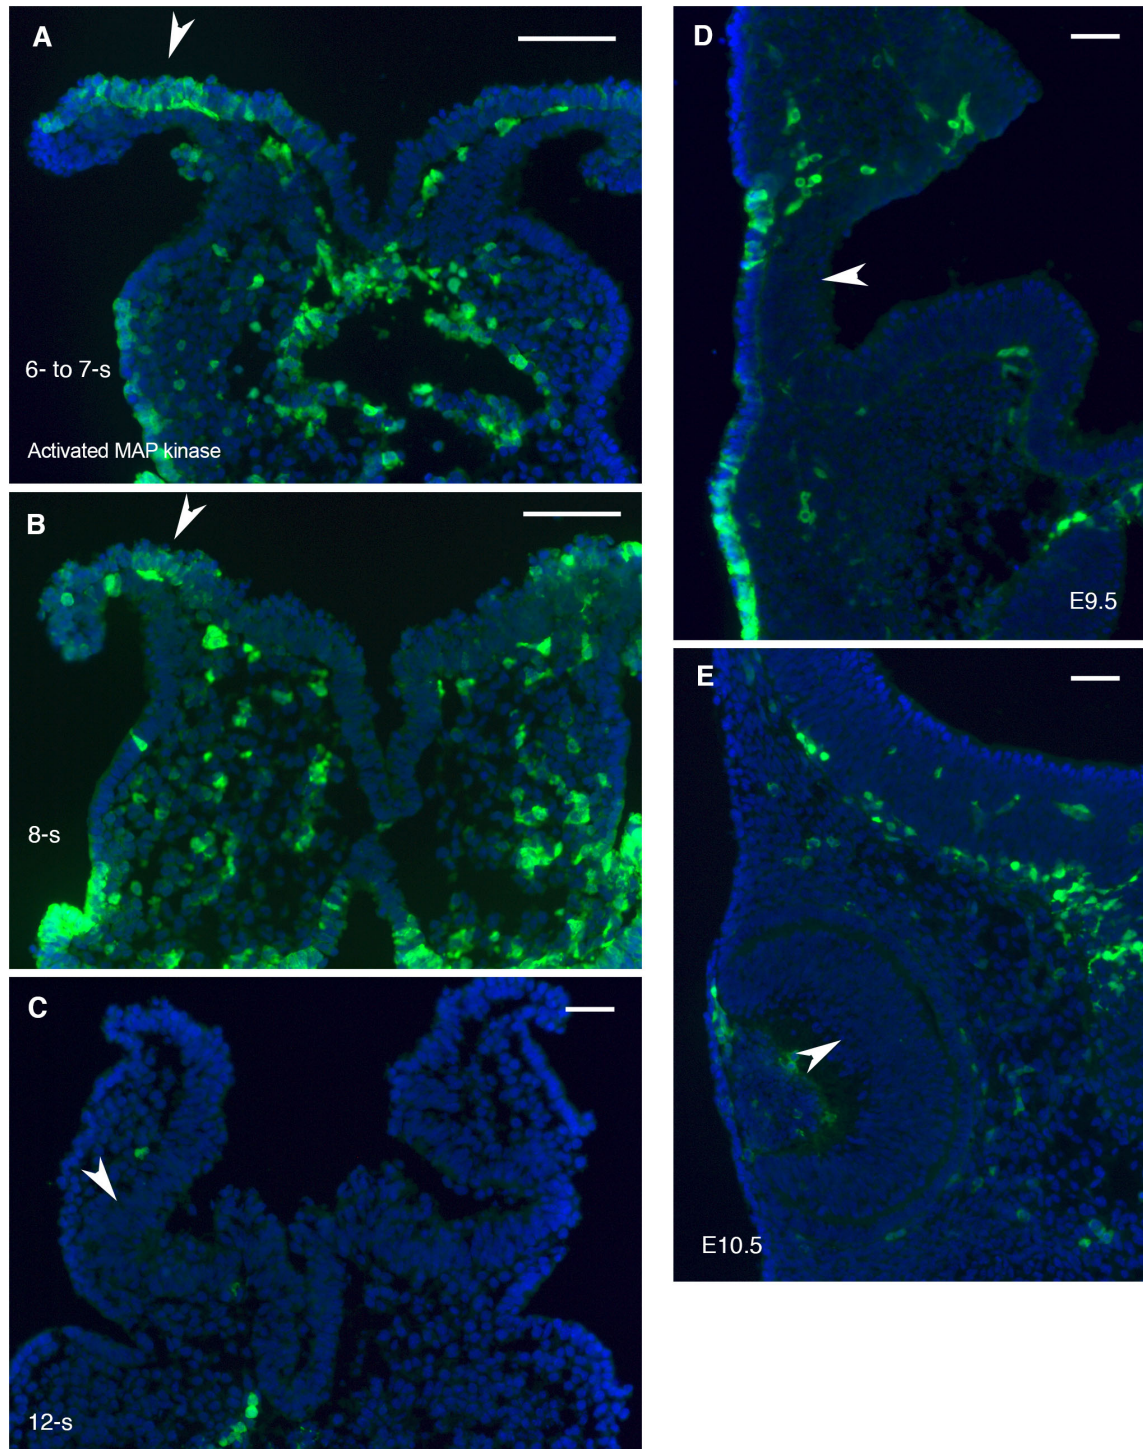

**Fig. S11. Activated MAP kinase/dpERK-1&2 signaling is found in early retinal development. Related to Fig. 6.** The results represent two embryos at each stage. (A-E) Activated MAP kinase was found in some cells in the optic pits at 6- to 8-somite stages (arrowheads in A-B), but was downregulated at later stages during retinal development (arrowheads in C-E). Scale bars, 100  $\mu$ m.



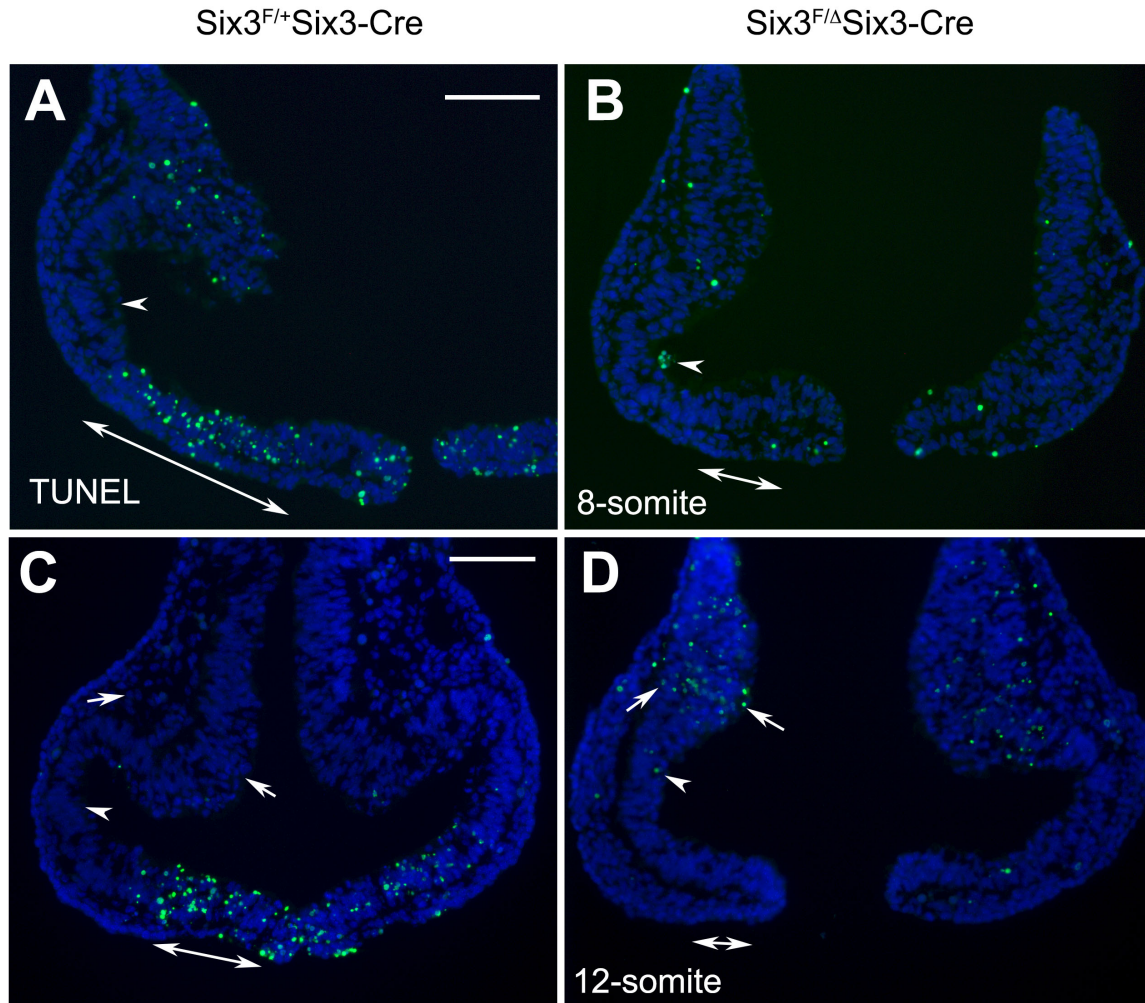

**Fig. S12. Apoptosis profiles in  $Six3^{Six3-Cre KO}$  embryos at 8- and 12-somite stages. Related to Fig. 6.** Represent three embryos. (A-D) Ectopic apoptosis at the optic pits/vesicles was found at 8-somite stage but became rare at 12-somite stage (arrowheads in A-D). Ectopic apoptosis in the dorsal optic vesicles and the dorsal periocular mesenchyme were observed at 12-somite stage (arrows in C, D). Physiological apoptosis at the ventral optic stalks and anteroventral neural ridge was significantly reduced (double-headed arrows in A-D). In addition, anterior neuropore closure was delayed in  $Six3^{Six3-Cre KO}$  mutant embryos (C, D). Scale bars, 100  $\mu$ m.

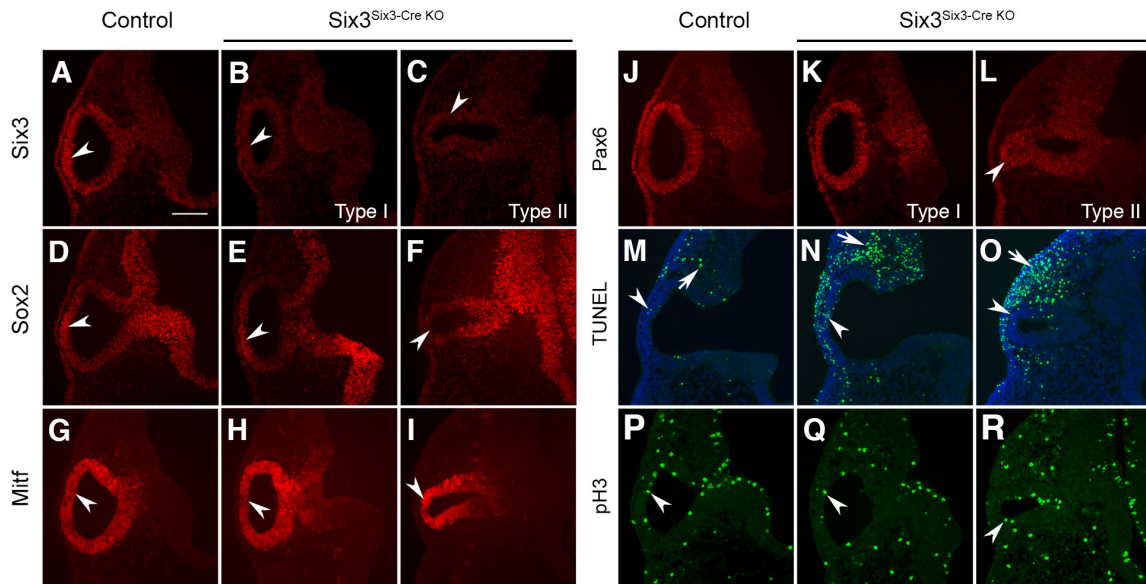

**Fig. S13. Characterization of  $Six3^{Six3-Cre KO}$  embryos at E9.5. Related to Figs 2, 6.** The results represent three mutant embryos. Transverse sections at E9.5 were used for immunostaining. **(A-C)**  $Six3$  expression was downregulated in both type I and II  $Six3^{Six3-Cre KO}$  embryos. In type II  $Six3^{Six3-Cre KO}$  embryos, the morphology of optic vesicles was defective (arrowheads in A-C). **(D-F)** In the control and type I  $Six3^{Six3-Cre KO}$  embryos, NR marker  $Sox2$  became restricted to the prospective NR territory in the optic vesicle (arrowheads in D, E). In type II  $Six3^{Six3-Cre KO}$  embryos, the prospective NR is missing, as indicated by the lack of  $Sox2$  expression (arrowhead in F). **(G-H)** RPE marker  $Mitf$  started to become downregulated in the prospective NR in the control and type I  $Six3^{Six3-Cre KO}$  optic vesicles, but  $Mitf$  was continuously strong in type II  $Six3^{Six3-Cre KO}$  defective vesicles (arrowheads in G-I). **(J-L)** Levels of  $Pax6$  expression were comparable in the control and  $Six3^{Six3-Cre KO}$  embryos (arrowhead in L). **(M-O)** Compared with that in the controls, apoptosis was grossly normal in the mutant optic vesicles, but was substantially increased in the pericocular mesenchyme (arrowheads and arrows in M-O, respectively). **(P-R)**  $pH3$  expression in the control, type I and type II  $Six3^{Six3-Cre KO}$  embryos (arrowheads in P-R). Scale bar, 100  $\mu m$ .
